# Supplementary material for: Propranolol for Severe Hemangiomas of Infancy
Source: Atypon-hosted journal article supplement (doi:10.1056/nejmc0708819), 2008-06-11
Supplement: nejm_leaute-labreze_2649sa1.pdf [file nejm_leaute-labreze_2649sa1.pdf]

## Supplementary Appendix

This appendix has been provided by the authors to give readers additional information about their work.

Supplement to: Léauté-Labrèze C, Dumas de la Roque E, Hubiche T, et al. Propranolol for severe hemangiomas of infancy. *N Engl J Med* 2008;358:2649-51.

Table 1. Characteristics and Treatment of the 11 Patients in the Study.\*

| Variable                             | Patient No.                      |                                                          |                                                                          |                                                                                   |                                                                                                                                                   |                                                                                                                            |                                         |                                                    |                        |                                                                                                                    |                                                                               |
|--------------------------------------|----------------------------------|----------------------------------------------------------|--------------------------------------------------------------------------|-----------------------------------------------------------------------------------|---------------------------------------------------------------------------------------------------------------------------------------------------|----------------------------------------------------------------------------------------------------------------------------|-----------------------------------------|----------------------------------------------------|------------------------|--------------------------------------------------------------------------------------------------------------------|-------------------------------------------------------------------------------|
| Characteristic                       | 1                                | 2                                                        | 3                                                                        | 4                                                                                 | 5                                                                                                                                                 | 6                                                                                                                          | 7                                       | 8                                                  | 9                      | 10                                                                                                                 | 11                                                                            |
| Sex                                  | M                                | M                                                        | F                                                                        | F                                                                                 | F                                                                                                                                                 | F                                                                                                                          | M                                       | M                                                  | F                      | F                                                                                                                  | F                                                                             |
| Birth date                           | 4/5/2006                         | 9/29/2006                                                | 12/23/2006                                                               | 9/12/2006                                                                         | 11/8/2006                                                                                                                                         | 11/28/2006                                                                                                                 | 5/24/2007                               | 2/9/2007                                           | 4/26/2007              | 7/9/2007                                                                                                           | 7/29/2007                                                                     |
| Location of IH                       | Nose                             | Face (periorbital area and parotid gland) and upper limb | Face (periorbital area, parotid gland, and lip)                          | Face (periorbital and subglottic areas and parotid gland)                         | Periorbital area                                                                                                                                  | Periorbital area                                                                                                           | Face (inferior eyelid, cheek, and lips) | Periorbital area and forehead (two distinct areas) | Forehead               | Forearm                                                                                                            | Face (glabella)                                                               |
| <b>Treatment</b>                     |                                  |                                                          |                                                                          |                                                                                   |                                                                                                                                                   |                                                                                                                            |                                         |                                                    |                        |                                                                                                                    |                                                                               |
| Previous treatment with prednisolone |                                  |                                                          |                                                                          |                                                                                   |                                                                                                                                                   |                                                                                                                            |                                         |                                                    |                        |                                                                                                                    |                                                                               |
| Dosage (mg/kg/day)                   | 3                                | 3, then 5                                                | 2                                                                        | 2–3                                                                               | None                                                                                                                                              | None                                                                                                                       | None                                    | None                                               | None                   | None                                                                                                               | None                                                                          |
| Effect on IH                         | Stabilization                    | Continued growth                                         | Stabilization                                                            | Stabilization, but relapse of dyspnea at each attempt to stop treatment           |                                                                                                                                                   |                                                                                                                            |                                         |                                                    |                        |                                                                                                                    |                                                                               |
| Age at discontinuation (mo)          | 5.5                              | 4                                                        | 4                                                                        | 7                                                                                 |                                                                                                                                                   |                                                                                                                            |                                         |                                                    |                        |                                                                                                                    |                                                                               |
| Outcome                              | No regrowth                      | No regrowth                                              | No regrowth                                                              | No regrowth                                                                       |                                                                                                                                                   |                                                                                                                            |                                         |                                                    |                        |                                                                                                                    |                                                                               |
| Propranolol                          |                                  |                                                          |                                                                          |                                                                                   |                                                                                                                                                   |                                                                                                                            |                                         |                                                    |                        |                                                                                                                    |                                                                               |
| Age at initiation (mo)               | 4                                | 2                                                        | 2                                                                        | 6                                                                                 | 2                                                                                                                                                 | 6                                                                                                                          | 2                                       | 4                                                  | 4                      | 2                                                                                                                  | 2                                                                             |
| Reason for treatment                 | Hypertrophic myocardiopathy      | Increased cardiac output                                 |                                                                          |                                                                                   |                                                                                                                                                   |                                                                                                                            |                                         |                                                    |                        |                                                                                                                    |                                                                               |
| Dosage (mg/kg/day)                   | 3                                | 2                                                        | 2                                                                        | 2                                                                                 | 2                                                                                                                                                 | 2                                                                                                                          | 2                                       | 2                                                  | 2                      | 2                                                                                                                  | 2                                                                             |
| Regression of IH                     |                                  |                                                          |                                                                          |                                                                                   |                                                                                                                                                   |                                                                                                                            |                                         |                                                    |                        |                                                                                                                    |                                                                               |
| Visual assessment                    | Yes                              | In volume and color                                      | Yes                                                                      | Yes                                                                               | Yes                                                                                                                                               | In color and thickness                                                                                                     | In color and thickness                  | In color and thickness                             | In color and thickness | In color and thickness                                                                                             | In color and thickness                                                        |
| Ultrasound findings†                 |                                  |                                                          |                                                                          |                                                                                   | At D7 of treatment; decrease in size (21 mm vs. 32 mm in diameter and 6 mm vs. 12 mm in thickness), at 60 days, no subcutaneous component visible | 150 days after initiation of treatment, decrease in thickness (10 mm vs. 14 mm) and resistive index, (0.6–0.7 vs. 0.5–0.6) |                                         |                                                    |                        | 60 days after initiation of treatment, decrease in thickness (6 mm vs. 9 mm) and resistive index (0.6–0.7 vs. 0.5) | 60 days after initiation of treatment, decrease in thickness (4 mm vs. 10 mm) |
| Other effects                        |                                  | Spontaneous eye reopening without amblyopia              | Eye reopening                                                            | Improvement of dyspnea: disappearance of subglottic hemangioma on nasofibroscopy) |                                                                                                                                                   |                                                                                                                            |                                         |                                                    |                        |                                                                                                                    |                                                                               |
| Age at discontinuation (mo)          | 14                               | 9                                                        | 12                                                                       | 14                                                                                | 9                                                                                                                                                 | 11                                                                                                                         | 6                                       | 8                                                  | 7                      | 8                                                                                                                  | Ongoing                                                                       |
| IH status at discontinuation         | Stable                           | Mild recoloration, no regrowth                           | Stable (mild recoloration and regrowth when propranolol stopped at 9 mo) | Mild recoloration and regrowth                                                    | Mild recoloration                                                                                                                                 | No relapse                                                                                                                 | Stable                                  | No relapse                                         | Mild regrowth          | Stable                                                                                                             | Ongoing                                                                       |
| Age at last follow-up (mo)           | 18                               | 18                                                       | 14                                                                       | 15                                                                                | 16                                                                                                                                                | 11                                                                                                                         | 10                                      | 8                                                  | 7                      | 8                                                                                                                  | 8                                                                             |
| IH status at last follow-up          | Regression in color, no regrowth | Regression in color, no regrowth                         | Regression in color                                                      | Stable                                                                            | Regression in color                                                                                                                               | Regression in color and thickness                                                                                          | Regression in color                     | Stabilization                                      | Stabilization          | Regression in color and thickness                                                                                  | Regression in color and thickness                                             |

\* Stabilization was defined as the absence of clinical growth in the hemangioma and the absence of significant regression. The resistive index = (peak systolic velocity – diastolic flow) ÷ peak systolic velocity. During the growth phase of a hemangioma, the resistive index is low, and it increases during the involuting phase. IH denotes infantile hemangioma, and NA not available.

† Ultrasound findings were not available for all patients.
